# Supplementary material for: Profiling of BABA-induced differentially expressed genes of Zea mays using suppression subtractive hybridization
Source: Royal Society of Chemistry journal article supplement (doi:10.1039/c7ra06220f), 2017-01-01
Supplement: c7ra06220f1.pdf [file c7ra06220f1.pdf]

Experiment: Standard  
Curve010917

Experiment Results Report

Applied Biosystems StepOne™  
Instrument

## Standard Curves

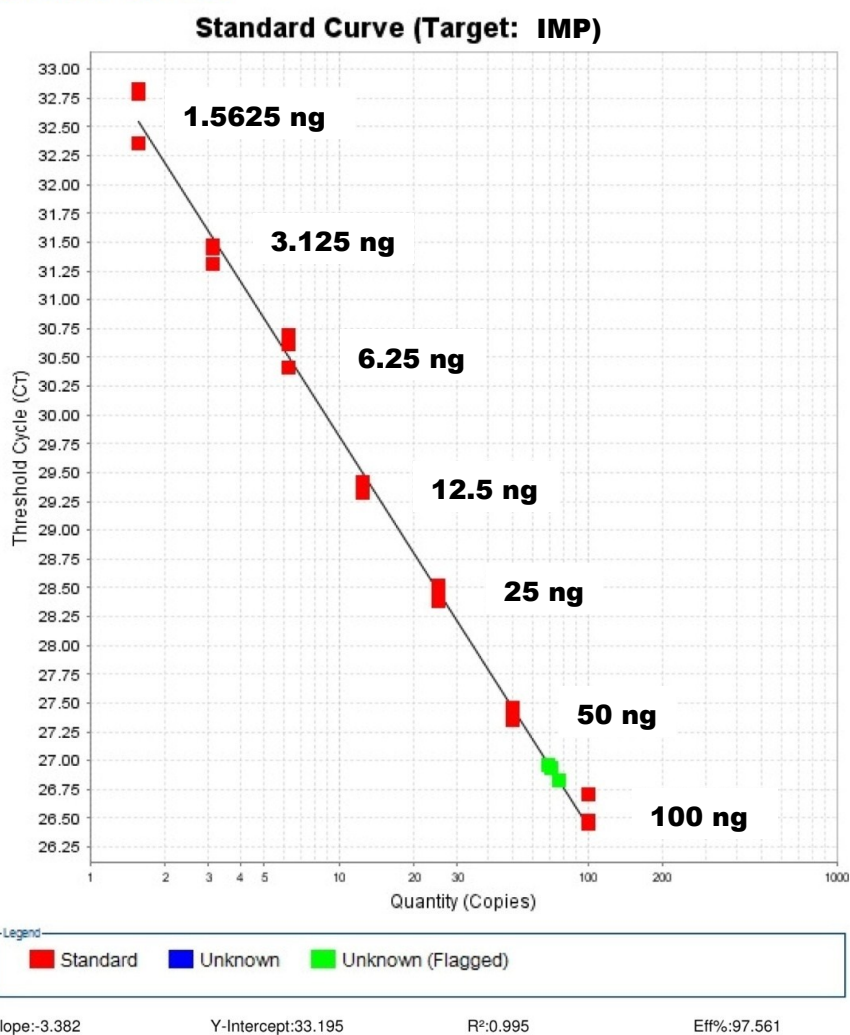

**Supplementary Fig. 1a.** Standard curve of *IMP*. The detection limit of target gene (*IMP*) is 3.125 ng of RNA/ 10  $\mu$ l reaction.

### Standard Curve (Target: GAPDH)

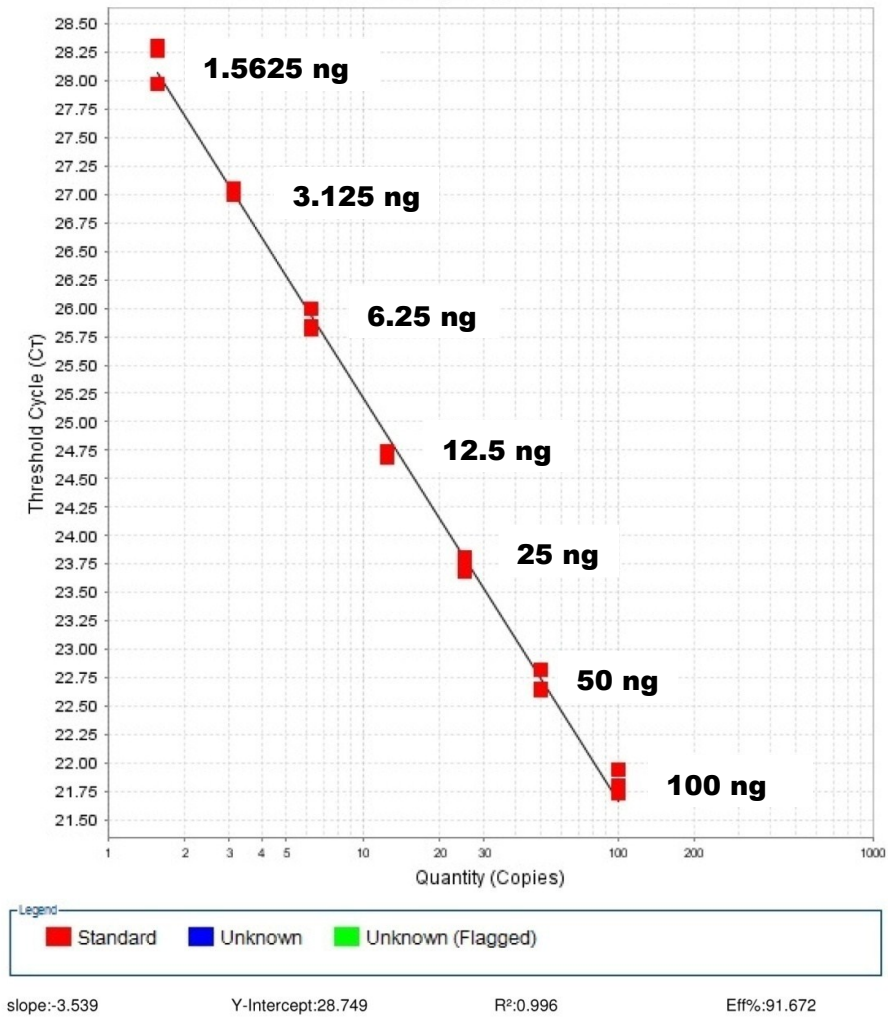

Supplementary Fig. 1b. Standard curve of GAPDH.

**Supplementary Table 1.** List of primers used in semi-quantitative RT-PCR.

| Sl. No.                | Target gene                        | Accession number | Primer sequence                                                                        | Tm                                           | Cycles for sqRT-PCR |
|------------------------|------------------------------------|------------------|----------------------------------------------------------------------------------------|----------------------------------------------|---------------------|
| <b>Forward Library</b> |                                    |                  |                                                                                        |                                              |                     |
| 1.                     | <i>Alpha amylase</i>               | JZ923597         | Forward: 5'-GTGCCCAAGTGATCCAGAGT-3'<br>Reverse: 5'-TCGAAGAGGGTCATTTTTGG-3'             | 60.12 <sup>o</sup> C<br>60.04 <sup>o</sup> C | 35                  |
| 2.                     | <i>Inositol Monophosphatase3</i>   | JZ923581         | Forward: 5'-TTTGATTTGATGTCGCGAAG-3'<br>Reverse: 5'-CCGAGGTACAGGTGCAGAAT-3'             | 59.70 <sup>o</sup> C<br>60.13 <sup>o</sup> C | 35                  |
| 3.                     | <i>Tocopherol cyclase</i>          | JZ923601         | Forward: 5'-GCAACATGGCAGCACTAGAA- 3'<br>Reverse: 5'-TTGGGAGGAGGCTCTCTACA- 3'           | 60.02 <sup>o</sup> C<br>59.94 <sup>o</sup> C | 35                  |
| 4.                     | <i>Aspartic proteinase</i>         | JZ923601         | Forward: 5'-ATTGTGAAGCTGGAGCAAGG- 3'<br>Reverse: 5'- TGAAGACGTCCCAAGAATC- 3'           | 60.40 <sup>o</sup> C<br>60.05 <sup>o</sup> C | 35                  |
| 5.                     | <i>NADP dependent malic enzyme</i> | JZ923606         | Forward: 5'-GGCCGAGGTACAAATAACGA - 3'<br>Reverse: 5'- AACAAACCTGCAAGGACCAC- 3'         | 59.96 <sup>o</sup> C<br>60.01 <sup>o</sup> C | 35                  |
| 6.                     | <i>PEPCK</i>                       | JZ923598         | Forward: 5'-GCGAGGTTGAGGTCTATGCT- 3'<br>Reverse: 5'-ACCACTCCCTCTTCATGCAC - 3'          | 59.46 <sup>o</sup> C<br>60.12 <sup>o</sup> C | 35                  |
| 7.                     | <i>Zm_FL51</i>                     | JZ923588         | Forward: 5'- TGAAATGGTTTACCGTGCTG- 3'<br>Reverse: 5'-TGTTGTGTGGCACAAGTGAA - 3'         | 59.58 <sup>o</sup> C<br>59.75 <sup>o</sup> C | 35                  |
| 8.                     | <i>Zm_FL300</i>                    | JZ923602         | Forward: 5'- TCTACTGAACAACAATCCTGCAA - 3'<br>Reverse: 5'- ATCTAGAAATAGCTGGGGATTGG - 3' | 59.80 <sup>o</sup> C<br>59.59 <sup>o</sup> C | 35                  |
| <b>Reverse Library</b> |                                    |                  |                                                                                        |                                              |                     |
| 1.                     | <i>Metal transporter Nramp5</i>    |                  | Forward: 5'-TTCATCGTCGAGAGGGAAAC- 3'<br>Reverse: 5'-GTGGCTGCTTCTAGGCAAAC- 3'           | 60.20 <sup>o</sup> C<br>60.02 <sup>o</sup> C | 35                  |
| 2.                     | <i>Zm_RL303</i>                    |                  | Forward: 5'- CGAGAATGTCGGCTTGAGTA - 3'<br>Reverse: 5'- CCTGATCTTAGGCCCTGACT - 3'       | 59.02 <sup>o</sup> C<br>58.35 <sup>o</sup> C | 35                  |
| 3.                     | <i>Zm_RL143</i>                    |                  | Forward: 5'- GGCTCGAGGCATTTTCTCTAC-3'<br>Reverse: 5'- GGACGGAGGAGGCTAGGTTA-3'          | 60.35 <sup>o</sup> C<br>60.59 <sup>o</sup> C | 35                  |
| 4.                     | <i>Zm_RL365</i>                    |                  | Forward: 5'-GTCCATCGACTAGCCTTTC- 3'<br>Reverse: 5'- CGAGAATGTCGGCTTGAGTA-3'            | 59.70 <sup>o</sup> C<br>59.02 <sup>o</sup> C | 35                  |

**Supplementary Table 2.** List of primers used in qRT-PCR experiments.

| Sl. No. | Target gene                                                                         | Accession No.         | Primer sequence               | size | Tm    | L  | From - To |
|---------|-------------------------------------------------------------------------------------|-----------------------|-------------------------------|------|-------|----|-----------|
| 1.      | <i>Zea mays</i> NADP-dependent malic enzyme mRNA, complete cds                      | <b>AY864063.1</b>     | F: 5'-AGGAGAAGAGGATGTTGCAG-3' | 194  | 57.03 | 20 | 455-648   |
|         |                                                                                     |                       | R: 5'-TCGGAAGATTGACCCATACT-3' |      | 57.05 |    |           |
| 2.      | <i>Zea mays</i> clone 263825 inositol monophosphatase 3 mRNA, complete cds          | <b>EU963535.1</b>     | F: 5'-TTTGTATGTGTCTCCGTTGG-3' | 191  | 57.02 | 20 | 304-494   |
|         |                                                                                     |                       | R: 5'-CTATTGGTTCGAGCCTCTGT-3' |      | 56.86 |    |           |
| 3.      | <i>Zea mays</i> thioredoxin h-like protein (LOC541940), mRNA                        | <b>NM_001111603.1</b> | F: 5'-CATTGCTCCTGTCTATGCTG-3' | 100  | 57.02 | 20 | 180-279   |
|         |                                                                                     |                       | R: 5'-GTCCCATGAAGAGCTGAAGT-3' |      | 56.86 |    |           |
| 4.      | <i>Zea mays</i> clone 337337 aspartic proteinase Asp1 precursor, mRNA, complete cds | <b>EU969925.1</b>     | F: 5'-TAGCCTTGTTTCACAGCTCA-3' | 103  | 57.22 | 20 | 585-687   |
|         |                                                                                     |                       | R: 5'-AACATCATCCCCAAGAAGA-3'  |      | 57.02 |    |           |
| 5.      | <i>Zea mays</i> mRNA for phosphoenolpyruvate carboxykinase, complete cds            | <b>AB018744.1</b>     | F: 5'-GCAGACCATGTACCACTTCA-3' | 169  | 57.07 | 20 | 1479-1647 |
|         |                                                                                     |                       | R: 5'-GCCGTACTTCTGCATCTTCT-3' |      | 57.17 |    |           |

L, length

**Supplementary Table 3.** Gene ontology term-based functional categorization of BABA-primed maize leaf (forward library) ESTs obtained by suppressive subtractive hybridization, based on biological process. Data distribution summary from BLAST2GO.

| <b>GO-term</b>                                     | <b>No. of sequences</b> |
|----------------------------------------------------|-------------------------|
| DNA repair                                         | 30                      |
| inositol phosphate dephosphorylation               | 12                      |
| phosphatidylinositol phosphorylation               | 12                      |
| response to cold                                   | 12                      |
| inositol biosynthetic process                      | 12                      |
| L-ascorbic acid biosynthetic process               | 12                      |
| cell communication                                 | 12                      |
| signal transduction                                | 12                      |
| single organism signaling                          | 12                      |
| response to oxidative stress                       | 11                      |
| response to salt stress                            | 11                      |
| phloem sucrose loading                             | 10                      |
| defense response                                   | 10                      |
| myo-inositol hexakisphosphate biosynthetic process | 10                      |
| regulation of defense response                     | 10                      |
| xanthophyll metabolic process                      | 10                      |
| vitamin E biosynthetic process                     | 10                      |
| fatty acid metabolic process                       | 10                      |
| chlorophyll metabolic process                      | 10                      |

**Supplementary Table 4.** Gene ontology term-based functional categorization of control maize leaf ESTs, obtained by suppressive subtractive hybridization, based on biological process. Data distribution summary from BLAST2GO.

| <b>GO-term</b> | <b>No. of sequences</b> |
|----------------|-------------------------|
| transport      | 113                     |

**Supplementary Table 5.** Gene ontology term-based functional categorization of BABA-primed maize leaf (forward library) ESTs, obtained by suppressive subtractive hybridization, based on cellular component. Data distribution summary from BLAST2GO.

| <b>GO-term</b>        | <b>No. of sequences</b> |
|-----------------------|-------------------------|
| Nucleus               | 31                      |
| extracellular region  | 30                      |
| Mitochondrion         | 16                      |
| Cytosol               | 12                      |
| plasma membrane       | 12                      |
| chloroplast envelope  | 10                      |
| chloroplast thylakoid | 10                      |
| Plastoglobule         | 10                      |

**Supplementary Table 6.** Gene ontology term-based functional categorization of control maize leaf ESTs, obtained by suppressive subtractive hybridization, based on cellular component. Data distribution summary from BLAST2GO.

| <b>GO-term</b>                 | <b>No. of sequences</b> |
|--------------------------------|-------------------------|
| mitochondrion                  | 144                     |
| integral component of membrane | 113                     |
| chloroplast                    | 31                      |



**Supplementary Table 7.** Blast Top hit distribution of matched unigenes among different species generated from BLASTX in forward library. Data distribution summary from BLAST2GO.

| <b>Species</b>           | <b>#BLAST Top-Hits</b> |
|--------------------------|------------------------|
| <i>Zea mays</i>          | 92                     |
| <i>Lotus japonicas</i>   | 16                     |
| <i>Oryza sativa</i>      | 2                      |
| <i>Genlisea aurea</i>    | 2                      |
| <i>Sorghum bicolor</i>   | 2                      |
| <i>Heuchera sanguine</i> | 1                      |
| <i>Setaria italic</i>    | 1                      |

**Supplementary Table 8.** Blast Top hit distribution of matched unigenes among different species generated from BLASTX in reverse library. Data distribution summary from BLAST2GO.

| <b>Species</b>                        | <b>#BLAST Top-Hits</b> |
|---------------------------------------|------------------------|
| <i>Glycine max</i>                    | 121                    |
| <i>Lotus japonicus</i>                | 36                     |
| <i>Vigna angularis var. angularis</i> | 34                     |
| <i>Morus notabilis</i>                | 5                      |
| <i>Medicago truncatula</i>            | 3                      |
| <i>Cajanus cajan</i>                  | 3                      |
| <i>Jatropha curcas</i>                | 1                      |

**Supplementary Table 9.** Gene ontology term-based functional categorization of BABA-primed maize leaf (forward library) ESTs, obtained by suppressive subtractive hybridization, based on molecular function. Data distribution summary from BLAST2GO.

| GO-term                                                                            | No. of sequences |
|------------------------------------------------------------------------------------|------------------|
| zinc ion binding                                                                   | 46               |
| nucleic acid binding                                                               | 31               |
| hydrolase activity, acting on acid anhydrides, in phosphorus-containing anhydrides | 30               |
| phosphoric diester hydrolase activity                                              | 30               |
| alpha-amylase activity                                                             | 30               |
| calcium ion binding                                                                | 30               |
| inositol monophosphate 1-phosphatase activity                                      | 12               |
| L-galactose-1-phosphate phosphatase activity                                       | 12               |
| magnesium ion binding                                                              | 12               |
| tocopherol cyclase activity                                                        | 10               |

**Supplementary Table 10.** Gene ontology term-based functional categorization of control maize leaf ESTs, obtained by suppressive subtractive hybridization, based on molecular function. Data distribution summary from BLAST2GO.

| <b>GO-term</b>       | <b>No. of sequences</b> |
|----------------------|-------------------------|
| transporter activity | 113                     |
| zinc ion binding     | 32                      |

**Supplementary Table 11.** InterPro Scan (IPS) analysis showing the number of ESTs without IPS domains, with IPS domains, and GO domains in both libraries. Data distribution summary from BLAST2GO.

| <b>Type</b> | <b>Number of sequences</b> |                        |
|-------------|----------------------------|------------------------|
|             | <b>Forward Library</b>     | <b>Reverse Library</b> |
| without IPS | 143                        | 204                    |
| with IPS    | 49                         | 0                      |
| with GOs    | 35                         | 0                      |

**Supplementary Table 12.** IPS domain analysis of functionally annotated ESTs from forward SSH library. Data distribution summary from BLAST2GO.

| <b>IPS Domain</b>                                         | <b>No. of sequences</b> |
|-----------------------------------------------------------|-------------------------|
| (IPR013780) Glycosyl hydrolase, all-beta                  | 30                      |
| (IPR012850) Alpha-amylase, C-terminal beta-sheet          | 30                      |
| (IPR033121) Peptidase family A1 domain                    | 2                       |
| (IPR021109) Aspartic peptidase domain                     | 2                       |
| (IPR012301) Malic enzyme, N-terminal domain               | 1                       |
| (IPR016040) NAD(P)-binding domain                         | 1                       |
| (IPR012302) Malic enzyme, NAD-binding                     | 1                       |
| (IPR008210) Phosphoenolpyruvate carboxykinase, N-terminal | 1                       |

**Supplementary Table 13.** KEGG pathway analysis of functionally annotated ESTs from forward SSH library. Data distribution summary from BLAST2GO.

| <b>Pathway</b>                              | <b>Pathway ID</b> | <b>Enzyme</b>                                                                                                                                                                                                                                            | <b>No. of Seqs of Enzyme</b> |
|---------------------------------------------|-------------------|----------------------------------------------------------------------------------------------------------------------------------------------------------------------------------------------------------------------------------------------------------|------------------------------|
| Starch and sucrose metabolism               | map00500          | ec:3.2.1.1 - glycogenase                                                                                                                                                                                                                                 | 30                           |
| Biosynthesis of antibiotics                 | map01130          | ec:3.1.3.25 - phosphatase,<br>ec:4.1.1.49 - carboxykinase (ATP)                                                                                                                                                                                          | 13                           |
| Inositol phosphate metabolism               | map00562          | ec:3.1.3.25 - phosphatase                                                                                                                                                                                                                                | 12                           |
| Phosphatidylinositol signaling system       | map04070          | ec:3.1.3.25 - phosphatase                                                                                                                                                                                                                                | 12                           |
| Streptomycin biosynthesis                   | map00521          | ec:3.1.3.25 - phosphatase                                                                                                                                                                                                                                | 12                           |
| Aminobenzoate degradation                   | map00627          | ec:3.1.3.41 - nitrophenyl phosphatase                                                                                                                                                                                                                    | 12                           |
| Pyruvate metabolism                         | map00620          | ec:1.1.1.39 - dehydrogenase (decarboxylating),<br>ec:4.1.1.49 - carboxykinase (ATP),<br>ec:1.1.1.38 - dehydrogenase (oxaloacetate-decarboxylating),<br>ec:1.1.1.40 - dehydrogenase (oxaloacetate-decarboxylating) (NADP+),<br>ec:4.1.1.3 - decarboxylase | 3                            |
| Carbon fixation in photosynthetic organisms | map00710          | ec:1.1.1.39 - dehydrogenase (decarboxylating),<br>ec:4.1.1.49 - carboxykinase (ATP),<br>ec:1.1.1.40 - dehydrogenase (oxaloacetate-decarboxylating) (NADP+)                                                                                               | 3                            |
| Glycolysis / Gluconeogenesis                | map00010          | ec:4.1.1.49 - carboxykinase (ATP)                                                                                                                                                                                                                        | 1                            |
| Citrate cycle (TCA cycle)                   | map00020          | ec:4.1.1.49 - carboxykinase (ATP)                                                                                                                                                                                                                        | 1                            |

**Supplementary Table 14.** GO annotations of all the subtractive ESTs of forward library were performed using the Blast2GO program on the basis of biological process.

| <b>GO ID</b>      | <b>GO Name</b>                          | <b>Parents (Name)</b>                                                                                                                         | <b>No. of<br/>Seqs</b> |
|-------------------|-----------------------------------------|-----------------------------------------------------------------------------------------------------------------------------------------------|------------------------|
| <b>GO:0008152</b> | metabolic process                       | biological_process                                                                                                                            | 58                     |
| <b>GO:0009987</b> | cellular process                        | biological_process                                                                                                                            | 56                     |
| <b>GO:0006950</b> | response to stress                      | response to stimulus                                                                                                                          | 53                     |
| <b>GO:0006281</b> | DNA repair                              | single-organism metabolic process, DNA<br>metabolic process, single-organism<br>cellular process, cellular response to DNA<br>damage stimulus | 30                     |
| <b>GO:0009058</b> | biosynthetic process                    | metabolic process                                                                                                                             | 24                     |
| <b>GO:0009628</b> | response to abiotic<br>stimulus         | response to stimulus                                                                                                                          | 23                     |
| <b>GO:0009266</b> | response to temperature<br>stimulus     | response to abiotic stimulus                                                                                                                  | 22                     |
| <b>GO:0007165</b> | signal transduction                     | single organism signaling, cellular<br>response to stimulus, cell communication,<br>regulation of cellular process                            | 12                     |
| <b>GO:0046855</b> | inositol phosphate<br>dephosphorylation | inositol phosphate catabolic process,<br>phosphorylated carbohydrate<br>dephosphorylation, single-organism<br>carbohydrate metabolic process  | 12                     |
| <b>GO:0009915</b> | phloem sucrose loading                  | sucrose transport, phloem transport                                                                                                           | 10                     |



**Supplementary table 15.** GO annotations of all the subtractive ESTs of forward library were performed using the Blast2GO program on the basis of molecular function

| <b>GO ID</b> | <b>GO Name</b>                                | <b>Parents (Name)</b>                                          | <b>No. of<br/>Seqs</b> |
|--------------|-----------------------------------------------|----------------------------------------------------------------|------------------------|
| GO:0043169   | cation binding                                | ion binding                                                    | 59                     |
| GO:0016788   | hydrolase activity, acting on ester bonds     | hydrolase activity                                             | 42                     |
| GO:0003676   | nucleic acid binding                          | heterocyclic compound binding, organic cyclic compound binding | 31                     |
| GO:0016817   | hydrolase activity, acting on acid anhydrides | hydrolase activity                                             | 30                     |
| GO:0016798   | hydrolase activity, acting on glycosyl bonds  | hydrolase activity                                             | 30                     |
| GO:0016160   | amylase activity                              | hydrolase activity, hydrolyzing O-glycosyl compounds           | 30                     |
| GO:0016791   | phosphatase activity                          | phosphoric ester hydrolase activity                            | 12                     |
| GO:0009976   | tocopherol cyclase activity                   | cyclase activity                                               | 10                     |

**Supplementary Table 16.** GO annotations of all the subtractive ESTs of forward library were performed using the Blast2GO program on the basis of cellular component.

| <b>GO ID</b> | <b>GO Name</b>           | <b>Parents (Name)</b>                                          | <b>No. of<br/>Seqs</b> |
|--------------|--------------------------|----------------------------------------------------------------|------------------------|
| GO:0005634   | nucleus                  | intracellular membrane-bounded organelle                       | 31                     |
| GO:0005576   | extracellular<br>region  | cellular_component                                             | 30                     |
| GO:0005739   | mitochondrion            | cytoplasmic part, intracellular membrane-<br>bounded organelle | 16                     |
| GO:0005886   | plasma membrane          | cell periphery, membrane, cell part                            | 12                     |
| GO:0005829   | cytosol                  | cytoplasmic part                                               | 12                     |
| GO:0010287   | plastoglobule            | chloroplast stroma, chloroplast part                           | 10                     |
| GO:0009534   | chloroplast<br>thylakoid | plastid thylakoid, chloroplast, chloroplast part               | 10                     |
| GO:0009941   | chloroplast<br>envelope  | plastid envelope, chloroplast part                             | 10                     |

**Supplementary Table 17.** GO annotations of all the subtractive ESTs of reverse library were performed using the Blast2GO program on the basis of biological process.

| <b>GO ID</b> | <b>GO Name</b> | <b>Parents (Name)</b>         | <b>No. of Seqs</b> |
|--------------|----------------|-------------------------------|--------------------|
| GO:0006810   | transport      | establishment of localization | 113                |

**Supplementary Table 18.** GO annotations of all the subtractive ESTs of reverse library were performed using the Blast2GO program on the basis of molecular function.

| <b>GO ID</b>      | <b>GO Name</b>       | <b>Parents (Name)</b>        | <b>No. of Seqs</b> |
|-------------------|----------------------|------------------------------|--------------------|
| <b>GO:0005215</b> | transporter activity | molecular_function           | 113                |
| <b>GO:0008270</b> | zinc ion binding     | transition metal ion binding | 32                 |

**Supplementary Table 19.** GO annotations of all the subtractive ESTs of reverse library were performed using the Blast2GO program on the basis of cellular component.

| <b>GO ID</b> | <b>GO Name</b>                 | <b>Parents (Name)</b>                                      | <b>No. of Seqs</b> |
|--------------|--------------------------------|------------------------------------------------------------|--------------------|
| GO:0016021   | integral component of membrane | intrinsic component of membrane                            | 113                |
| GO:0005739   | mitochondrion                  | cytoplasmic part, intracellular membrane-bounded organelle | 144                |
| GO:0009507   | chloroplast                    | plastid                                                    | 31                 |
